# Supplementary material
Source: Springer Nature journal article supplement (https://www.springermedizin.de/resource/supplementary/12936_2010_1433_MOESM1_ESM.PDF/9549796)
Supplement: MOESM1 [file 9549796]

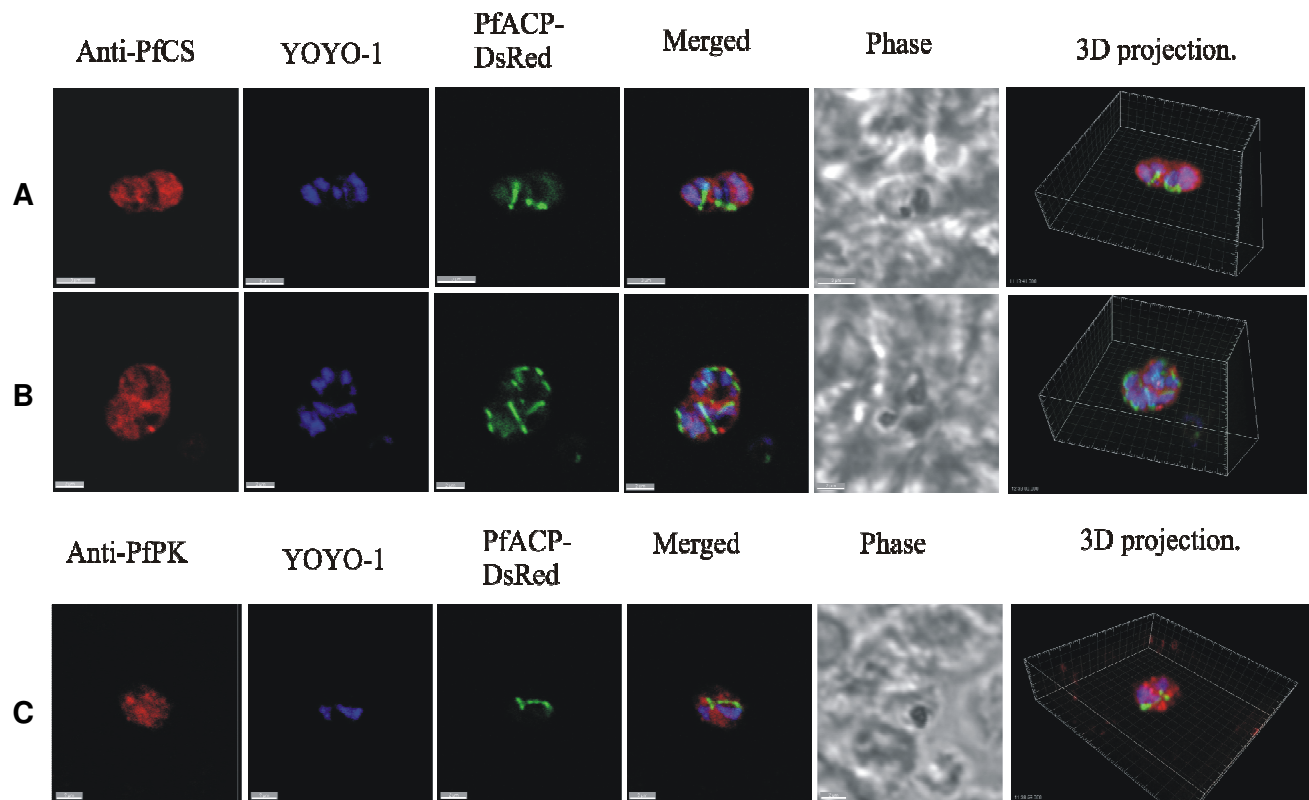

### Supplementary Figure 1 - Negative control images for organellar staining.

**A** and **B**. anti-PfCS (chorismate synthase), **C**. anti-PfPK (cyclin-dependent protein kinase 5), both enzymes previously characterised as having a simple cytoplasmic distribution {Fitzpatrick, 2001 #618}. All parasites were expressing DsRED labelled PfACP. The control antibodies show little or no fluorescence coincident with the apicoplasts, despite the parasites being in the mitotic schizont phase where anti-PfSHMT fluorescence is most overt (scale bars **A** 3  $\mu\text{m}$ , **B** and **C** 2  $\mu\text{m}$ ).
